# Supplementary material for: Using repeat UAV-based laser scanning and multispectral imagery to explore eco-geomorphic feedbacks along a river corridor
Source: Copernicus journal article supplement (doi:10.5194/esurf-11-1223-2023), 2023-12-05
Supplement: Supplementary file 1 [file esurf-11-1223-2023-supplement.zip]

Archive with 2 entries (2 files):
- esurf-11-1223-2023-supplement-title-page.pdf
- Drag_Data_Supplementary.xlsx
