# Supplementary material for: Using repeat UAV-based laser scanning and multispectral imagery to explore eco-geomorphic feedbacks along a river corridor
Source: Copernicus journal article supplement (doi:10.5194/esurf-11-1223-2023), 2023-12-05
Supplement: Supplementary file 1 [file esurf-11-1223-2023-supplement.zip › Drag_Data_Supplementary.xlsx]

## Sheet: Sheet1
The values provided below represent reconstructed values for frontla areas and for plant density, as well as assumed values of Cd based on the current literature. More important here is the change in subsequnet drag being captured by density and changes in frontal area and likely reconfiguration, as opposed to the absolutre values of excess drag. Values used from here should be done so with cauti…
Winter
Group	Frontal Area (flow depths)					Cd					Plants per m2	Drag per m2
	0.1	0.5	1	2	4	0.1	0.5	1	2	4		0.1	0.5	1	2	4
Herbs	0.0018	0.0177	0.0204	0.0204	0.0204	1	1	1	1	1	1.16	0.00301716	0.0296687	0.0341945	0.0341945	0.0341945
Reeds	0.0053	0.0286	0.041	0.049	0.049	1	1	1	1	1	1.63	0.0124834	0.067363	0.0965693	0.115412	0.115412
Shrubs	0.0885	0.6755	1.588	4.32	10.25	1	1	1	1	1	0.04	0.0051153	0.0390439	0.0917864	0.249696	0.59245
Low DBH	0.0285	0.2395	0.472	1.264	3.55	1	1	1	1	1	0.11	0.00453007	0.0380685	0.0750244	0.200913	0.564272
High DBH	0.051	0.2928	0.5846	1.8942	6.3942	1	1	1	1	1	0.01	0.00073695	0.00423096	0.00844747	0.0273712	0.0923962
Summer
Group	Frontal Area (flow depths)					Cd					Plants per m2	Drag per m2
	0.1	0.5	1	2	4	0.1	0.5	1	2	4		0.1	0.5	1	2	4
Herbs	0.0036	0.0354	0.0408	0.0408	0.0408	0.6	0.55	0.55	0.55	0.55	1.16	0.00362059	0.0326356	0.0376139	0.0376139	0.0376139
Reeds	0.0106	0.0572	0.082	0.098	0.098	0.8	0.8	0.6	0.6	0.6	1.63	0.0199734	0.107781	0.115883	0.138495	0.138495
Shrubs	0.13275	1.01325	2.382	6.48	15.375	1	0.8	0.8	0.8	0.8	0.04	0.00767295	0.0468527	0.110144	0.299635	0.71094
Low DBH	0.0285	0.2395	0.472	1.3904	3.905	1	1	1	1	1	0.11	0.00453007	0.0380685	0.0750244	0.221004	0.6207
High DBH	0.051	0.2928	0.5846	2.08362	7.03362	1	1	1	1	1	0.01	0.00073695	0.00423096	0.00844747	0.0301083	0.101636
												Drag Difference %
												120	110	110	110	110
												160	160	120	120	120
												150	120	120	120	120
												100	100	100	110	110
												100	100	100	110	110
