# Supplementary material for: Using repeat UAV-based laser scanning and multispectral imagery to explore eco-geomorphic feedbacks along a river corridor
Source: Copernicus journal article supplement (doi:10.5194/esurf-11-1223-2023), 2023-12-05
Supplement: Supplementary file 1 [file esurf-11-1223-2023-supplement.zip › esurf-11-1223-2023-supplement-title-page.pdf]

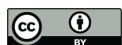

## *Supplement of*

# **Using repeat UAV-based laser scanning and multispectral imagery to explore eco-geomorphic feedbacks along a river corridor**

**Christopher Tomsett and Julian Leyland**

*Correspondence to:* Christopher Tomsett (c.g.tomsett@soton.ac.uk)

- esurf-11-1223-2023-supplement-title-page.pdf
- Drag\_Data\_Supplementary.xlsx

The copyright of individual parts of the supplement might differ from the article licence.
